# Supplementary material for: Hepatic decompensation is accelerated in patients with cirrhosis and alpha-1 antitrypsin Pi∗MZ genotype
Source: PubMed Central journal article supplement — JHEP Rep. 2022 Apr 5;4(6):100483. doi: 10.1016/j.jhepr.2022.100483 (PMC9097455; doi:10.1016/j.jhepr.2022.100483), 2022-04-05
Supplement: mmc1.pdf [file mmc1.pdf]

# Hepatic decompensation is accelerated in patients with cirrhosis and alpha-1 antitrypsin Pi\*MZ genotype

Vincent L. Chen, Daniel A. Burkholder, Isabel J. Moran, Jacob V. DiBattista, Matthew J. Miller, Yanhua Chen, Xiaomeng Du, Antonino Oliveri, Kelly C. Cushing, Anna S. Lok, Elizabeth K. Speliotes

## Table of contents

|               |   |
|---------------|---|
| Fig. S1.....  | 2 |
| Table S1..... | 3 |
| Table S2..... | 4 |
| Table S3..... | 5 |
| Table S4..... | 6 |

**Fig. S1.** Effects of Pi\*MS genotype on hepatic decompensation and liver-related death or liver transplant

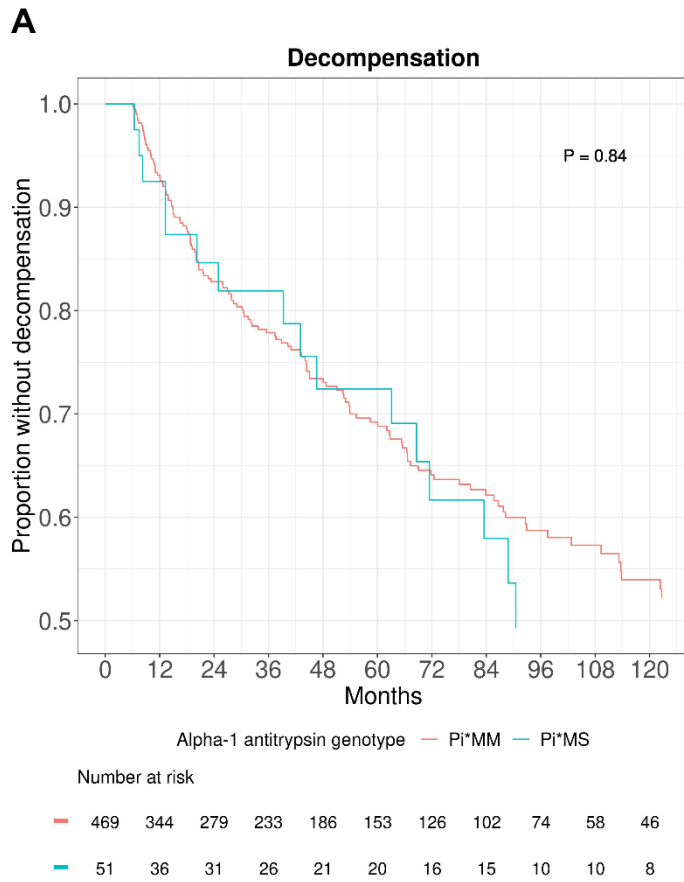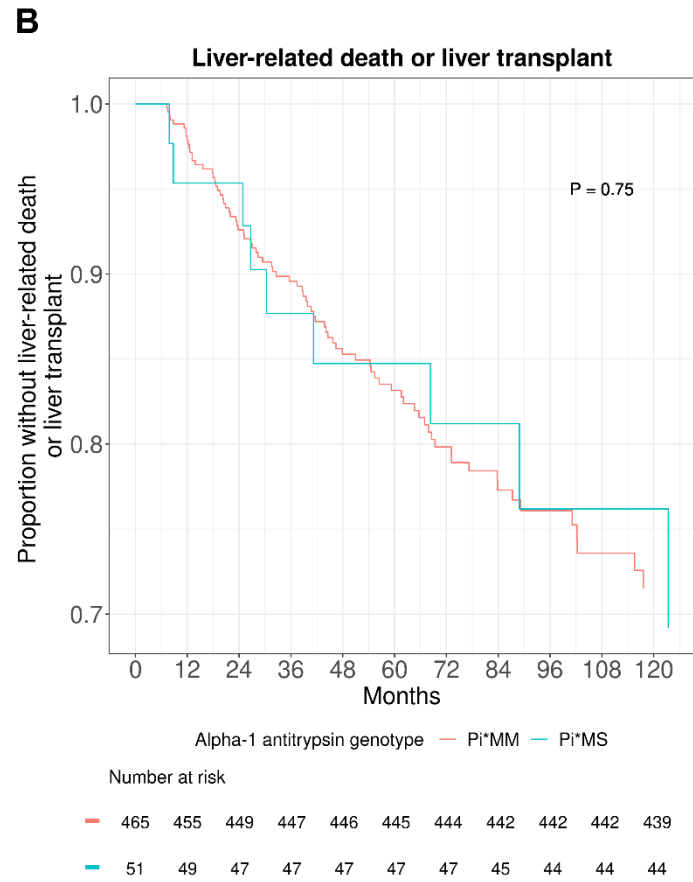

**Table S1:** Diagnosis codes for cirrhosis, hepatic decompensation, and hepatocellular carcinoma

| Disease                   | ICD-9                  | ICD-10                                                                     |                             |
|---------------------------|------------------------|----------------------------------------------------------------------------|-----------------------------|
| Cirrhosis, directly coded | 571.2, 571.5, 571.6    | K70.30, K70.31, K70.40, K70.41, K71.7, K74.3, K74.4, K74.5, K74.60, K74.69 |                             |
| Portal hypertension       | Ascites                | 789.59                                                                     | R18.8, K70.31               |
|                           | Hepatic encephalopathy | 572.2                                                                      | K72.11, K72.90, K72.91      |
|                           | Varices                | 456.0, 456.1, 456.20-456.21                                                | I85, I86.4                  |
|                           | Other                  | 572.4, 573.5, 572.3, 567.23                                                | K76.7, K76.81, K76.6, K65.2 |

ICD, International Classification of Diseases.

**Table S2:** Effects of Pi\*MS genotype on hepatic decompensation and liver-transplant or liver-related death

| Model   | Hepatic decompensation |         | Liver transplant or liver-related death |         |
|---------|------------------------|---------|-----------------------------------------|---------|
|         | Hazard ratio           | P value | Hazard ratio                            | P value |
| Model 1 | 1.07 (0.66-1.74)       | 0.77    | 1.05 (0.51-2.19)                        | 0.89    |
| Model 2 | 1.10 (0.66-1.86)       | 0.71    | 1.06 (0.50-2.28)                        | 0.88    |
| Model 3 | 1.32 (0.83-2.09)       | 0.24    | 1.22 (0.59-2.53)                        | 0.6     |
| Model 4 | 1.05 (0.65-1.70)       | 0.84    | 0.99 (0.47-2.12)                        | 0.98    |
| Model 5 | 1.29 (0.82-2.05)       | 0.27    | 1.12 (0.52-2.41)                        | 0.77    |

Hazard ratios (95% confidence interval) for the Pi\*MS genotype relative to Pi\*MM. Model 1 is adjusted for age, sex, disease etiology (non-alcoholic fatty liver disease or cryptogenic vs. other etiologies), and principal components 1-10. Model 2 is adjusted for model 1 covariates plus albumin. Model 3 is adjusted for model 1 covariates plus platelet count. Model 4 is adjusted for model 1 covariates plus model for end-stage liver disease score. Model 5 is adjusted for model 1 covariates plus platelet count and model for end-stage liver disease score.

**Table S3:** Effects of Pi\*MZ genotype on hepatic decompensation and liver transplant or liver-related death: subgroup analyses

| Category                                   |                                                  | Hepatic decompensation |         |                  | Liver transplant or liver-related death |         |                  |
|--------------------------------------------|--------------------------------------------------|------------------------|---------|------------------|-----------------------------------------|---------|------------------|
|                                            |                                                  | Hazard ratio           | P value | P <sub>het</sub> | Hazard ratio                            | P value | P <sub>het</sub> |
| Age                                        | < 60 years                                       | 1.66 (1.04-2.66)       | 0.034   | 0.42             | 2.12 (0.62-7.29)                        | 0.23    | 0.64             |
|                                            | >= 60 years                                      | 2.31 (1.22-4.38)       | 0.010   |                  | 1.43 (0.48-4.30)                        | 0.52    |                  |
| Sex                                        | Male                                             | 2.57 (1.63-4.05)       | <0.0001 | 0.10             | 2.57 (1.03-6.43)                        | 0.044   | 0.18             |
|                                            | Female                                           | 1.27 (0.63-2.58)       | 0.51    |                  | 0.69 (0.13-3.77)                        | 0.67    |                  |
| Etiology                                   | Non-alcoholic fatty liver disease or cryptogenic | 1.88 (0.92-3.83)       | 0.081   | 1.00             | 0.94 (0.13-6.89)                        | 0.95    | 0.38             |
|                                            | Other                                            | 1.88 (1.11-3.16)       | 0.018   |                  | 2.51 (1.01-6.27)                        | 0.048   |                  |
| Diabetes status                            | Diabetes                                         | 1.74 (1.05-2.89)       | 0.031   | 0.50             | 0.99 (0.37-2.67)                        | 0.98    | 0.042            |
|                                            | No diabetes                                      | 1.31 (0.70-2.48)       | 0.40    |                  | 7.40 (1.39-39.26)                       | 0.019   |                  |
| Body mass index                            | ≥ 35 kg/m <sup>2</sup>                           | 1.91 (1.15-3.16)       | 0.012   | 0.87             | 3.22 (1.05-9.83)                        | 0.04    | 0.087            |
|                                            | < 35 kg/m <sup>2</sup>                           | 2.05 (1.05-4.00)       | 0.035   |                  | 0.69 (0.18-2.71)                        | 0.59    |                  |
| Clinically significant portal hypertension | Absent                                           | 1.91 (0.98-3.72)       | 0.056   | 0.65             | 1.74 (0.85-3.59)                        | 0.13    | 0.96             |
|                                            | Present                                          | 2.29 (1.53-3.44)       | <0.001  |                  | 1.70 (0.82-3.52)                        | 0.15    |                  |

Hazard ratios (95% confidence interval) for the Pi\*MZ genotype relative to Pi\*MM. Models are adjusted for age, sex (except the sex-specific subgroup analysis), disease etiology (except for the etiology-specific analysis), and principal components 1-10. P<sub>het</sub> is the p value for heterogeneity between the different age, sex, or etiology categories. Clinically significant portal hypertension was defined as presence of varices or collaterals on endoscopy or imaging, or liver stiffness measurement ≥ 25 kPa on vibration-controlled transient elastography.

**Table S4:** Effects of Pi\*MZ genotype on individual decompensating events

| Outcome                | Hazard ratio     | P value |
|------------------------|------------------|---------|
| Ascites                | 1.82 (1.09-3.05) | 0.022   |
| Hepatic encephalopathy | 1.54 (0.97-2.43) | 0.065   |
| Variceal bleed         | 1.54 (0.56-4.24) | 0.41    |

Hazard ratios (95% confidence interval) for the Pi\*MZ genotype relative to Pi\*MM. All models are adjusted for age, sex, disease etiology (non-alcoholic fatty liver disease or cryptogenic vs. other etiologies), and principal components 1-10.
